# Supplementary material
Source: Springer Nature journal article supplement (https://www.springermedizin.de/resource/supplementary/12916_2013_1090_MOESM1_ESM.pdf/9598400)

**a.**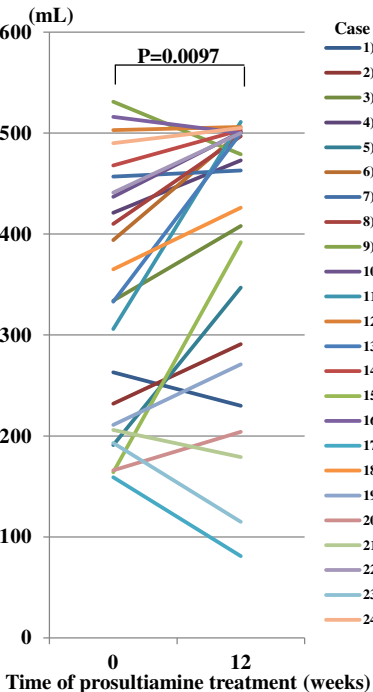**b.**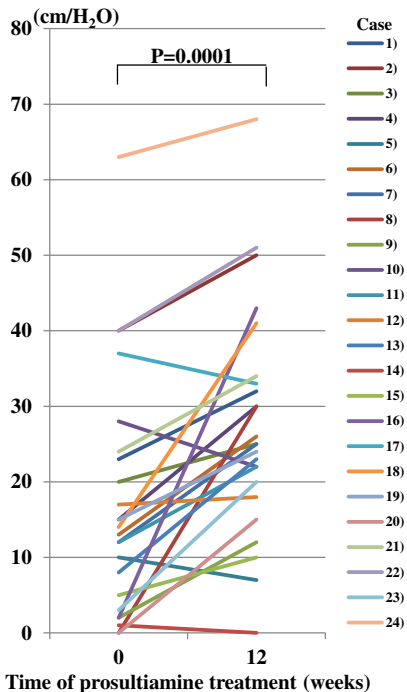**c.**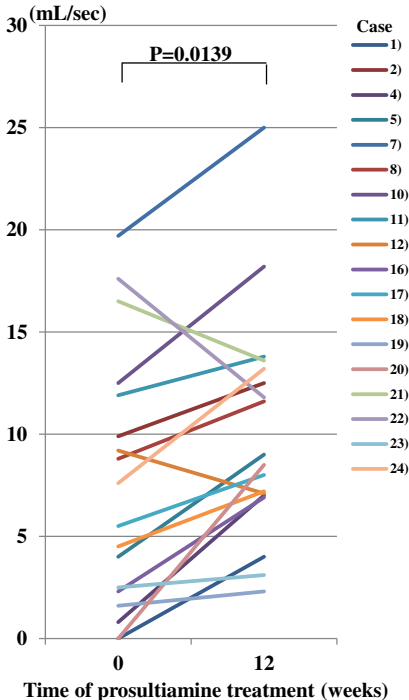

Supplement: MOESM1 [file 9598400]
